# Supplementary material for: Scalable generation of sensory neurons from human pluripotent stem cells
Source: PubMed Central journal article supplement — Stem Cell Reports. 2023 Apr 11;18(4):1030–47. doi: 10.1016/j.stemcr.2023.03.006 (PMC10147831; doi:10.1016/j.stemcr.2023.03.006), 2023-04-11
Supplement: mmc3.pdf [file mmc3.pdf]

**Table S2 (Deng et al.)**

|        |           | Nociceptors RNA-seq normalized counts (3 replicates at each time point) |           |           |           |           |           |           |           |            |            |            |            |            |            |            |            |            |  |
|--------|-----------|-------------------------------------------------------------------------|-----------|-----------|-----------|-----------|-----------|-----------|-----------|------------|------------|------------|------------|------------|------------|------------|------------|------------|--|
| Gene   | Day 0 - 1 | Day 0 - 2                                                               | Day 0 - 3 | Day 4 - 1 | Day 4 - 2 | Day 4 - 3 | Day 8 - 1 | Day 8 - 2 | Day 8 - 3 | Day 12 - 1 | Day 12 - 2 | Day 12 - 3 | Day 21 - 1 | Day 21 - 2 | Day 21 - 3 | Day 28 - 1 | Day 28 - 2 | Day 28 - 3 |  |
| SCN1A  | 32.63378  | 21.20595                                                                | 35.01409  | 10.56849  | 4.994754  | 2.337063  | 453.6262  | 346.2216  | 354.2262  | 67.31298   | 70.97562   | 80.17315   | 241.2549   | 227.647    | 209.3765   | 271.9445   | 272.5455   | 242.3641   |  |
| SCN1B  | 62.75726  | 54.94269                                                                | 77.27247  | 248.3594  | 292.1931  | 261.7511  | 22.84448  | 28.76302  | 36.40869  | 227.7683   | 220.813    | 251.6204   | 49.03556   | 55.2213    | 57.55372   | 45.06945   | 49.17488   | 35.18189   |  |
| SCN2A  | 37.65436  | 18.31423                                                                | 18.11073  | 35.66864  | 47.45016  | 42.06714  | 42.42547  | 49.00367  | 42.4768   | 196.46     | 219.8273   | 187.4818   | 1824.123   | 1718.622   | 1839.735   | 2718.681   | 2588.766   | 2688.484   |  |
| SCN2B  | 2.510291  | 1.927814                                                                | 2.414765  | 3.963183  | 3.746066  | 4.674126  | 22.84448  | 28.76302  | 27.30652  | 47.74525   | 43.37399   | 43.17016   | 330.4996   | 303.1536   | 356.2377   | 535.4862   | 451.7421   | 496.4556   |  |
| SCN3A  | 2.510291  | 0                                                                       | 0         | 29.06334  | 21.22771  | 19.86504  | 181.668   | 262.0631  | 304.1642  | 4304.9     | 4489.208   | 4294.814   | 5125.196   | 5465.781   | 5492.411   | 4810.973   | 4591.6     | 4753.465   |  |
| SCN3B  | 15.06174  | 9.639069                                                                | 15.69597  | 26.42122  | 37.46066  | 28.04476  | 60.91862  | 117.1827  | 124.7756  | 1379.916   | 1437.256   | 1337.042   | 3363.839   | 3394.419   | 3393.685   | 4678.82    | 4417.404   | 4490.578   |  |
| SCN4A  | 340.1444  | 350.8621                                                                | 441.9019  | 1052.886  | 991.4587  | 983.9036  | 50.0403   | 49.00367  | 46.26937  | 359.2634   | 363.7501   | 397.1655   | 14.71067   | 23.66627   | 20.83842   | 6.875001   | 5.834308   | 4.886374   |  |
| SCN4B  | 85.34988  | 80.00427                                                                | 94.17582  | 352.7233  | 375.8553  | 427.6825  | 149.0331  | 116.1174  | 137.2911  | 236.3781   | 181.3821   | 249.1535   | 335.4032   | 397.8187   | 333.4147   | 100.8333   | 90.84851   | 115.3184   |  |
| SCN5A  | 520.8853  | 515.6902                                                                | 620.5045  | 368.576   | 353.3789  | 338.8742  | 233.884   | 232.2348  | 207.0744  | 335.7822   | 283.9025   | 319.4592   | 559.0053   | 546.5781   | 505.0835   | 600.4167   | 488.4149   | 544.3364   |  |
| SCN7A  | 6.275726  | 14.4586                                                                 | 4.829529  | 9.247426  | 9.989508  | 1.168532  | 154.4722  | 134.2274  | 107.709   | 109.5793   | 119.2785   | 123.3433   | 743.379    | 703.2263   | 798.806    | 2245.07    | 2116.187   | 2130.459   |  |
| SCN8A  | 1541.318  | 1461.283                                                                | 1281.033  | 1034.391  | 1125.068  | 1155.678  | 4882.192  | 5517.174  | 5327.046  | 2006.866   | 2018.862   | 2054.9     | 1504.411   | 1559.72    | 1598.604   | 1203.125   | 1186.031   | 1161.002   |  |
| SCN9A  | 138.066   | 125.3079                                                                | 173.8631  | 48.87925  | 44.95279  | 28.04476  | 14.14182  | 20.24065  | 15.9288   | 733.3984   | 769.8883   | 873.2707   | 6191.229   | 6405.67    | 6840.935   | 5354.098   | 5062.512   | 5152.193   |  |
| SCN10A | 0         | 0                                                                       | 0         | 0         | 0         | 0         | 0         | 0         | 0         | 14.87147   | 23.65854   | 14.8012    | 478.587    | 367.3907   | 470.3528   | 263.5417   | 254.2091   | 258.9778   |  |
| SCN11A | 20.08232  | 16.38642                                                                | 25.35503  | 23.7791   | 16.23295  | 8.179721  | 75.06044  | 75.6361   | 87.98766  | 152.6283   | 170.5386   | 149.2454   | 323.8347   | 300.8997   | 296.6994   | 221.5278   | 175.0292   | 241.3869   |  |
| KCNQ1  | 150.6174  | 170.6115                                                                | 155.7523  | 60.7688   | 62.43443  | 57.25805  | 32.63498  | 49.00367  | 47.40714  | 21.91585   | 13.80082   | 18.5015    | 11.76853   | 7.888757   | 10.91536   | 17.56945   | 4.167363   | 2.931824   |  |
| KCNQ2  | 1479.816  | 1620.327                                                                | 1668.602  | 697.5202  | 508.2162  | 621.6588  | 363.3361  | 382.4417  | 439.9383  | 1753.268   | 1519.075   | 1583.728   | 1788.817   | 1871.889   | 1591.658   | 2078.542   | 1970.329   | 1857.799   |  |
| KCNQ3  | 84.09473  | 98.3185                                                                 | 72.44294  | 11.88955  | 16.23295  | 12.85385  | 18.49315  | 35.15481  | 29.58206  | 177.675    | 170.5386   | 155.4126   | 203.0072   | 205.1077   | 246.0918   | 241.3889   | 267.5447   | 267.7734   |  |
| KCNQ4  | 184.5064  | 169.6476                                                                | 150.9228  | 165.1326  | 197.2928  | 181.1274  | 58.74296  | 47.93837  | 43.99383  | 36.78732   | 36.47358   | 39.46986   | 37.26702   | 32.68199   | 32.74608   | 47.36112   | 46.67446   | 63.52286   |  |
| KCNQ5  | 72.78843  | 57.83441                                                                | 67.61341  | 1.321061  | 1.248689  | 0         | 0         | 3.195891  | 3.413314  | 2.348127   | 2.957318   | 3.700299   | 1.961422   | 9.015722   | 16.8692    | 42.77778   | 32.50543   | 37.13644   |  |
| FGF11  | 45.18523  | 56.87051                                                                | 59.16173  | 113.6112  | 98.6464   | 113.3476  | 13.05399  | 3.195891  | 9.102172  | 3.913545   | 12.81504   | 8.634032   | 14.71067   | 15.77751   | 5.953833   | 29.79167   | 26.67112   | 23.4546    |  |
| FGF12  | 646.3998  | 624.6117                                                                | 748.577   | 177.0222  | 201.0389  | 190.4706  | 886.5835  | 609.35    | 585.9523  | 238.7263   | 267.1444   | 240.5195   | 203.9879   | 178.0605   | 220.2918   | 198.6111   | 163.3606   | 148.5458   |  |
| FGF13  | 2190.228  | 2151.44                                                                 | 2281.953  | 397.6393  | 418.3107  | 413.6602  | 1165.069  | 1232.549  | 1142.323  | 4722.866   | 4881.546   | 4904.13    | 22265.08   | 22277.85   | 22905.39   | 26091.39   | 26961.17   | 26017.98   |  |
| FGF14  | 5.020581  | 3.855628                                                                | 4.829529  | 6.605304  | 12.48689  | 9.348252  | 10.87833  | 18.11005  | 14.41177  | 18.78502   | 22.67277   | 23.43523   | 33.34418   | 36.06289   | 46.63836   | 110.7639   | 128.3548   | 126.0681   |  |

|        |           | Nociceptors RNA-seq normalized counts (3 replicates at each time point) |           |           |           |           |           |           |           |            |            |            |            |            |            |            |            |            |          |
|--------|-----------|-------------------------------------------------------------------------|-----------|-----------|-----------|-----------|-----------|-----------|-----------|------------|------------|------------|------------|------------|------------|------------|------------|------------|----------|
| Gene   | Day 0 - 1 | Day 0 - 2                                                               | Day 0 - 3 | Day 4 - 1 | Day 4 - 2 | Day 4 - 3 | Day 8 - 1 | Day 8 - 2 | Day 8 - 3 | Day 12 - 1 | Day 12 - 2 | Day 12 - 3 | Day 21 - 1 | Day 21 - 2 | Day 21 - 3 | Day 28 - 1 | Day 28 - 2 | Day 28 - 3 |          |
| PDGFA  | 2737.472  | 2787.619                                                                | 2486      | 3778.191  | 3863.243  | 3807.981  | 10.87833  | 24.50183  | 13.274    | 75.14007   | 74.91871   | 67.83882   | 134.3574   | 114.9505   | 141.8997   | 119.9306   | 123.3539   | 96.7502    |          |
| PDGFB  | 3501.154  | 1541.287                                                                | 926.0622  | 22.45804  | 37.46066  | 28.04476  | 1.087833  | 2.130594  | 2.6548    | 3.913545   | 3.94309    | 11.1009    | 52.9584    | 52.96737   | 62.51525   | 165        | 189.1983   | 171.0231   |          |
| PDGFC  | 121.7491  | 118.5605                                                                | 124.3604  | 237.791   | 209.7797  | 252.4028  | 733.1991  | 776.6016  | 796.8193  | 375.7003   | 410.0814   | 389.7649   | 404.053    | 382.0412   | 440.5837   | 888.4029   | 980.1637   | 913.7519   |          |
| PDGFD  | 160.6586  | 194.7092                                                                | 195.5959  | 88.51108  | 98.6464   | 75.95455  | 143.5939  | 157.664   | 178.2509  | 104.883    | 108.435    | 94.97435   | 240.2742   | 210.7425   | 235.1764   | 417.0834   | 415.0693   | 444.68     |          |
| PDGFRA | 16.31689  | 10.60298                                                                | 24.14765  | 29.06334  | 26.22246  | 23.37063  | 158.8235  | 151.2722  | 132.3607  | 82.96716   | 103.5061   | 82.64002   | 79.4376    | 101.4269   | 106.1767   | 728.7501   | 855.9763   | 797.4562   |          |
| PDGFRB | 428.0045  | 440.5054                                                                | 377.9107  | 224.5804  | 182.3085  | 206.8301  | 253.465   | 307.8709  | 272.3066  | 1790.056   | 1640.325   | 1758.876   | 747.3019   | 829.4464   | 716.4446   | 2149.548   | 2076.18    | 2130.459   |          |
| PDGFRL | 57.73668  | 63.61785                                                                | 84.51676  | 50.20031  | 54.9423   | 52.58392  | 40.2498   | 41.54659  | 31.8576   | 1.565418   | 0          | 0          | 5.884267   | 6.761791   | 5.953834   | 42.01389   | 42.5071    | 40.06827   |          |
| EGF    | 351.8726  | 127.2357                                                                | 155.7523  | 130.785   | 163.5782  | 141.3923  | 31.54714  | 19.17535  | 17.44583  | 3.130836   | 0.985773   | 0          | 41.18987   | 34.93592   | 42.66914   | 20.625     | 39.17321   | 29.31824   |          |
| EGFR   | 345.1649  | 344.1148                                                                | 340.4818  | 130.785   | 117.3767  | 125.0329  | 2073.409  | 2542.864  | 2432.555  | 399.1816   | 335.1627   | 339.1941   | 588.4267   | 623.2118   | 639.0448   | 844.8612   | 921.8206   | 936.2293   |          |
| NTRK1  | 1.255145  | 6.747348                                                                | 6.036912  | 9.247426  | 6.243443  | 10.51678  | 219.7422  | 509.212   | 500.6194  | 3738.218   | 3417.673   | 3553.521   | 1460.279   | 1480.832   | 1295.951   | 16.80556   | 13.33556   | 10.75002   |          |
| NTRK2  | 1.255145  | 0                                                                       | 0         | 232.5067  | 144.8479  | 217.3469  | 344.8429  | 133.1621  | 146.7725  | 165.1516   | 169.5529   | 154.1791   | 5209.537   | 5473.67    | 5263.189   | 6686.32    | 7112.024   | 6748.084   |          |
| NTRK3  | 434.2803  | 458.8197                                                                | 361.0073  | 284.0281  | 242.7456  | 271.0993  | 358.9847  | 416.5312  | 442.2138  | 478.2352   | 424.868    | 558.7452   | 464.8571   | 413.5962   | 358.2223   | 337.6389   | 321.7204   | 333.2507   |          |
| NRG1   | 32.63378  | 56.87051                                                                | 20.5255   | 29.06334  | 39.95803  | 35.05595  | 471.0315  | 523.0609  | 565.8517  | 3436.093   | 3401.901   | 3269.831   | 2638.113   | 2759.938   | 2610.756   | 2177.848   | 2038.674   | 2026.868   |          |
| NRG2   | 2.510291  | 8.675162                                                                | 3.622147  | 3.963183  | 0         | 7.011189  | 39.16197  | 22.37124  | 26.548    | 25.8294    | 22.67277   | 33.30269   | 112.7818   | 92.41115   | 106.1767   | 111.5278   | 115.0192   | 99.68203   |          |
| NRG3   | 139.3211  | 140.7304                                                                | 101.4201  | 38.31077  | 36.21197  | 29.21329  | 115.3102  | 140.6192  | 127.0511  | 947.0779   | 898.0388   | 906.5733   | 1245.503   | 1250.931   | 1276.105   | 773.0557   | 746.7914   | 754.4561   |          |
| NRG4   | 100.4116  | 114.7049                                                                | 96.59059  | 101.7217  | 104.8898  | 112.179   | 125.1007  | 122.5092  | 121.7415  | 120.5372   | 124.2073   | 111.009    | 125.531    | 134.1089   | 159.7612   | 158.8889   | 165.861    | 142.6821   |          |
| VEGFA  | 1212.47   | 1219.342                                                                | 2121.371  | 2626.269  | 2335.048  | 2418.86   | 800.6447  | 442.0983  | 634.4972  | 619.9056   | 548.0895   | 573.5464   | 212.8143   | 236.6627   | 217.3149   | 362.0834   | 390.0651   | 373.319    |          |
| VEGFB  | 322.5723  | 344.1148                                                                | 399.6436  | 622.2197  | 585.6349  | 660.7209  | 41.33764  | 31.95891  | 61.43966  | 133.0605   | 84.77644   | 94.97435   | 246.1585   | 244.5515   | 223.2688   | 564.514    | 539.2567   | 501.342    |          |
| VEGFC  | 30.12349  | 46.26753                                                                | 41.051    | 9.247426  | 9.989508  | 19.86504  | 21.75665  | 19.17535  | 19.34211  | 0.782709   | 6.900408   | 1.233433   | 11.76853   | 11.26965   | 20.83842   | 87.84723   | 82.51378   | 75.25016   |          |
| VEGFD  | 6.275726  | 9.639069                                                                | 3.622147  | 3.963183  | 0         | 0         | 6.526995  | 9.587674  | 10.23994  | 54.00692   | 106.4634   | 117.1761   | 7.845689   | 12.39662   | 11.90767   | 12.98611   | 8.334725   | 13.68185   |          |
| FLT1   | 2506.525  | 2338.438                                                                | 2492.037  | 426.7027  | 518.2057  | 473.2553  | 7.614828  | 7.45708   | 4.930343  | 6.261672   | 8.871953   | 6.167166   | 0.980711   | 0          | 0          | 3.969222   | 21.38889   | 32.50543   | 17.59095 |
| KDR    | 7859.72   | 7475.098                                                                | 8003.737  | 4964.547  | 5109.634  | 5368.234  | 20.66882  | 19        |           |            |            |            |            |            |            |            |            |            |          |
